# Supplementary material
Source: ML conference proceedings conference paper supplement (https://proceedings.neurips.cc/paper_files/paper/2022/hash/760564ebba4797d0dcf1678e96e8cbcb-Abstract.html)
Supplement: Supplementary file 1 [file 760564ebba4797d0dcf1678e96e8cbcb-Supplemental-Conference.zip]

Archive with 2 entries (2 files):
- paper.pdf
- __MACOSX/._paper.pdf
